# Supplementary material for: Limits to sustained energy intake. XXIII. Does heat dissipation capacity limit the energy budget of lactating bank voles?
Source: Oxford University Press journal article supplement (doi:10.1242/jeb.134437), 2016-01-01
Supplement: jeb134437supp.pdf [file jeb134437supp.pdf]

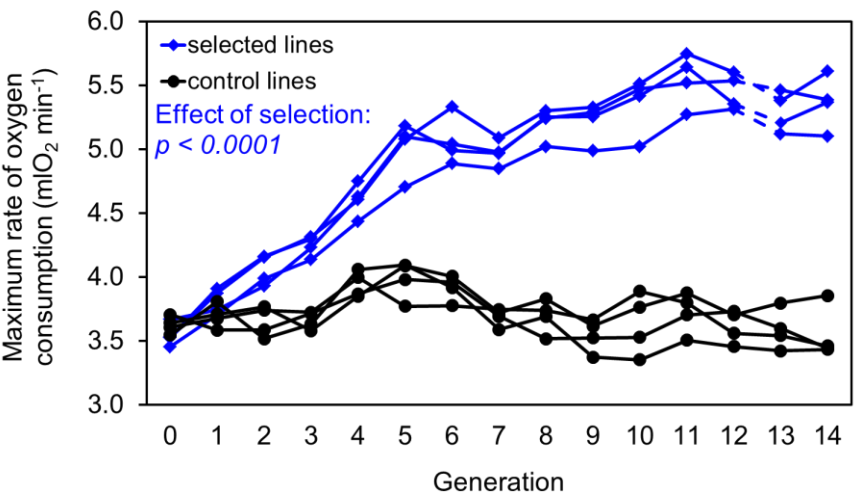

**Fig. S1. Results of 14 generations of selection for the maximum swim-induced rate of oxygen consumption in the bank vole.** Replicate line means (raw values, not adjusted for body mass). In generation 12 the selection was relaxed (broken line).

**Table S1.**

[Click here to Download Table S1](#)

**Table S2.**

[Click here to Download Table S2](#)

**Table S3.**

[Click here to Download Table S3](#)

**Table S4.**

[Click here to Download Table S4](#)

**Table S5.**

[Click here to Download Table S5](#)
